# Supplementary material for: The Medical Library Association Data Services Competency: a framework for data science and open science skills development
Source: PubMed Central journal article supplement (PMC7069817; doi:10.5195/jmla.2020.909), 2020-04-01
Supplement: jmla-108-304-s001.pdf [file jmla-108-304-s001.pdf]

## **The Medical Library Association Data Services Competency: a framework for data science and open science skills development**

Lisa Federer, AHIP; Erin Diane Foster; Ann Glusker, AHIP; Margaret Henderson, AHIP; Kevin Read; Shirley Zhao

### **APPENDIX**

#### **Skills extracted from the literature**

This list includes the forty-one skills extracted from thirteen articles and reports reviewed as part of the process of developing performance indicators.

#### **Data skills**

- data curation
- data discovery
- data ethics and security
- data literacy
- data management
- data management planning
- data policy
- data sharing
- data storage and preservation
- data structures and standards
- data use and reuse
- data visualization
- metadata and documentation
- repository support
- scholarly communication and licensing
- versioning and version control

#### **Programming, software, and technology skills**

- extensible markup language (XML)
- general computing
- geographic information system (GIS)
- scientific programming (including R, Python, Java, MATLAB, etc.)
- statistical software
- structured query language (SQL)
- web development and web 2.0
- web development and web technologies

**Scientific skills**

experimental design and research methods

subject matter expertise

**Librarianship skills**

general librarianship

reference skills

**Interpersonal skills**

commitment to lifelong learning

communication skills

ethics

evaluation

institutional awareness

interpersonal skills and relationship building

marketing and outreach

personal traits

problem solving

project and time management

service development

strategic planning

teaching skills
